# Supplementary material for: A Novel Modelling Methodology Which Predicts the Structural Behaviour of Vertebral Bodies under Axial Impact Loading: A Finite Element and DIC Study
Source: MDPI journal article supplement (doi:10.3390/ma13194262), 2020-09-24
Supplement: s1 [file s1]

Article

# A novel modelling methodology which predicts the structural behaviour of vertebral bodies under axial impact loading: a finite element and DIC study.

Bruno Agostinho Hernandez <sup>1,†</sup> , Harinderjit Singh Gill <sup>1,†</sup> and Sabina Gheduzzi <sup>1,†,\*</sup>

<sup>1</sup> Department of Mechanical Engineering, University of Bath Bath, BA2 7AY; bah33@bath.ac.uk (BAH), rg433@bath.ac.uk (HSG), enssg@bath.ac.uk (SG)

Version September 23, 2020 submitted to Materials

## 1. Supplementary Material

This section presents the remaining results for the calibration and validation models.

### 1.1. Quasi-Static Calibration Results - Load-Displacement curves

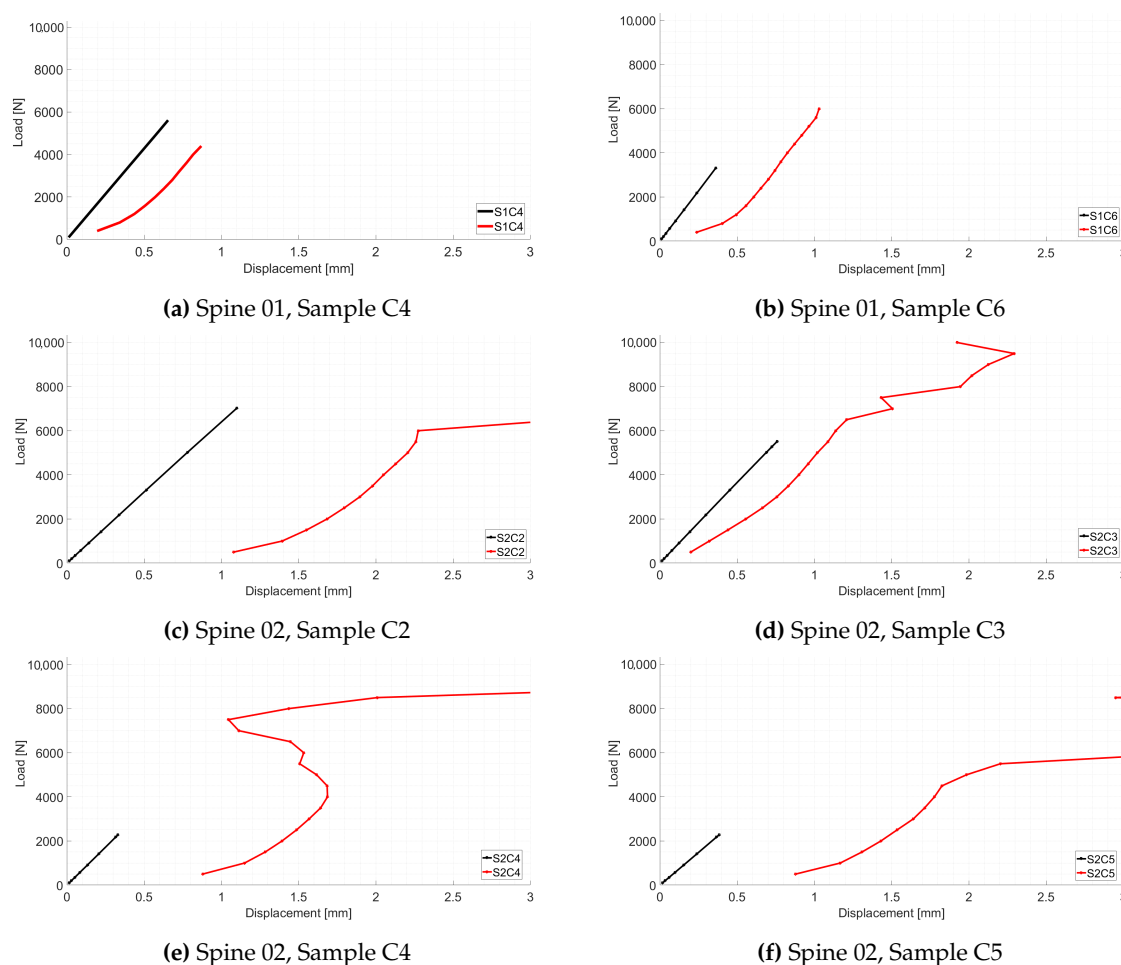

**Figure 1.** Load-Displacement curves from the calibration models. Red curves are the DIC/experimental results. Black curves are the numerical results.

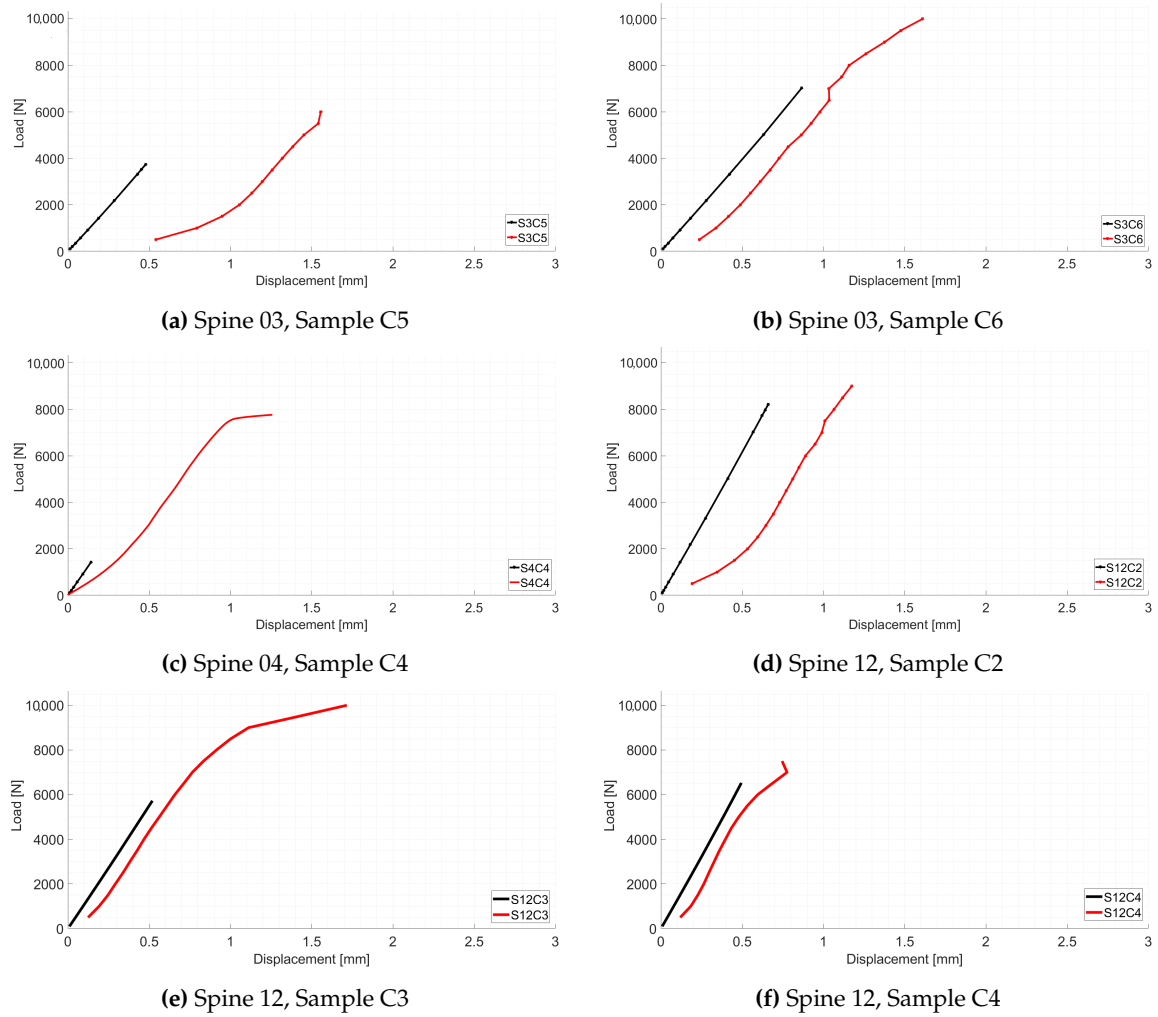

**Figure 2.** Load-Displacement curves from the calibration models. Red curves are the DIC/experimental results. Black curves are the numerical results.

### 1.2. Quasi-Static Validation Results - Load-Displacement curves

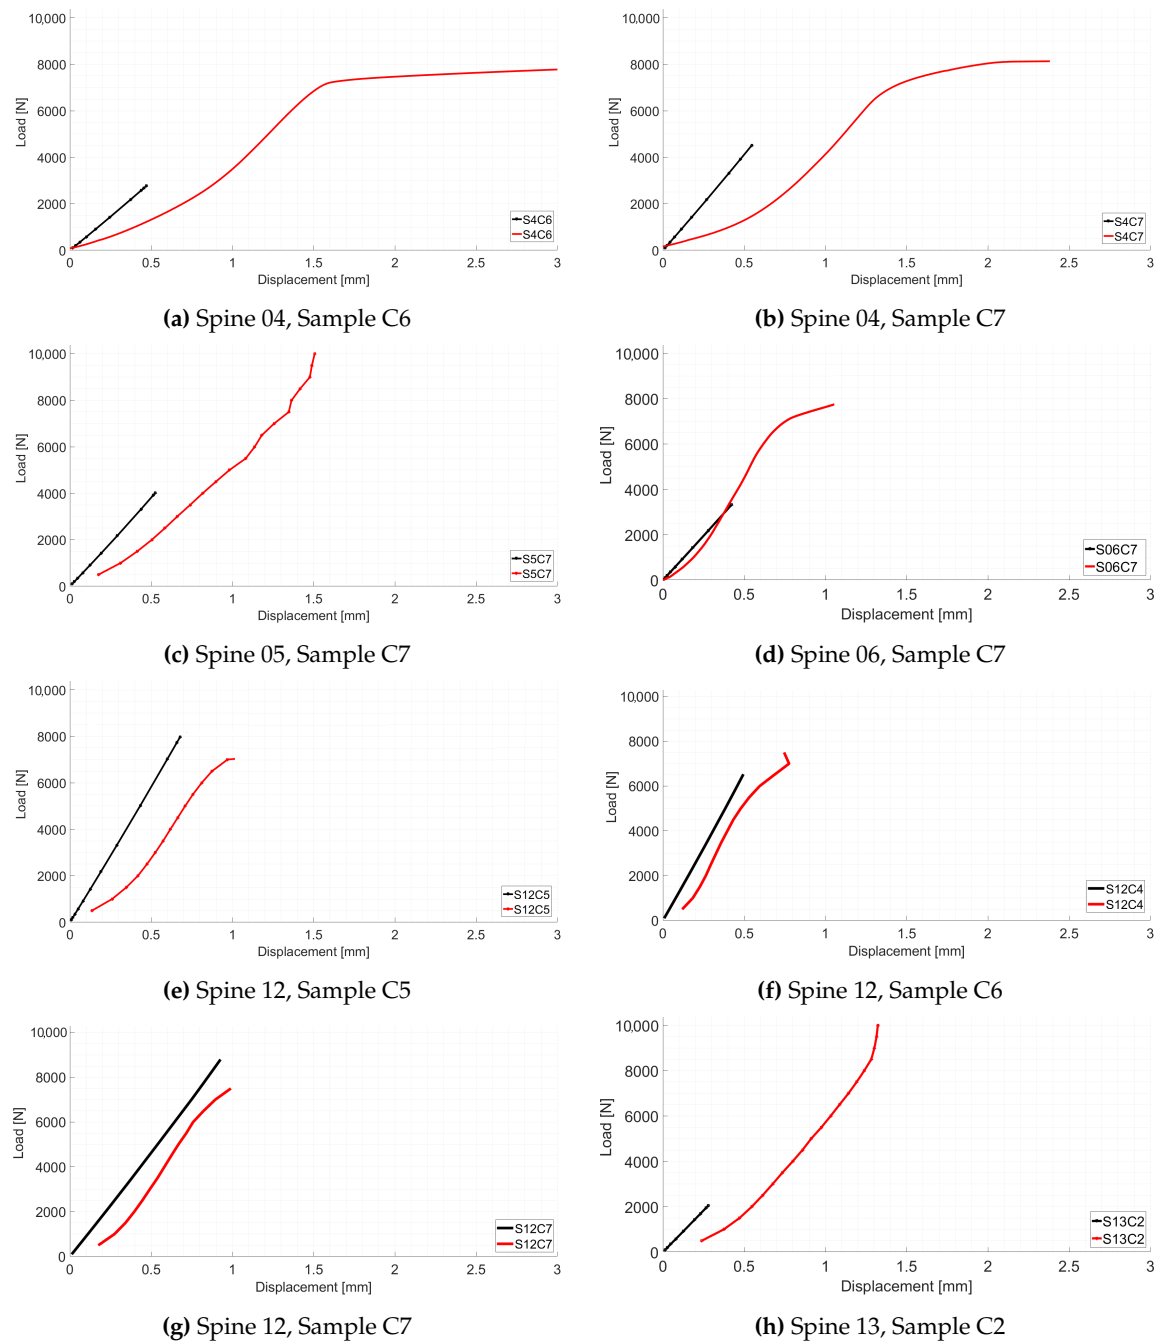

**Figure 3.** Load-Displacement curves from the validation models. Red curves are the DIC/experimental results. Black curves are the numerical results.

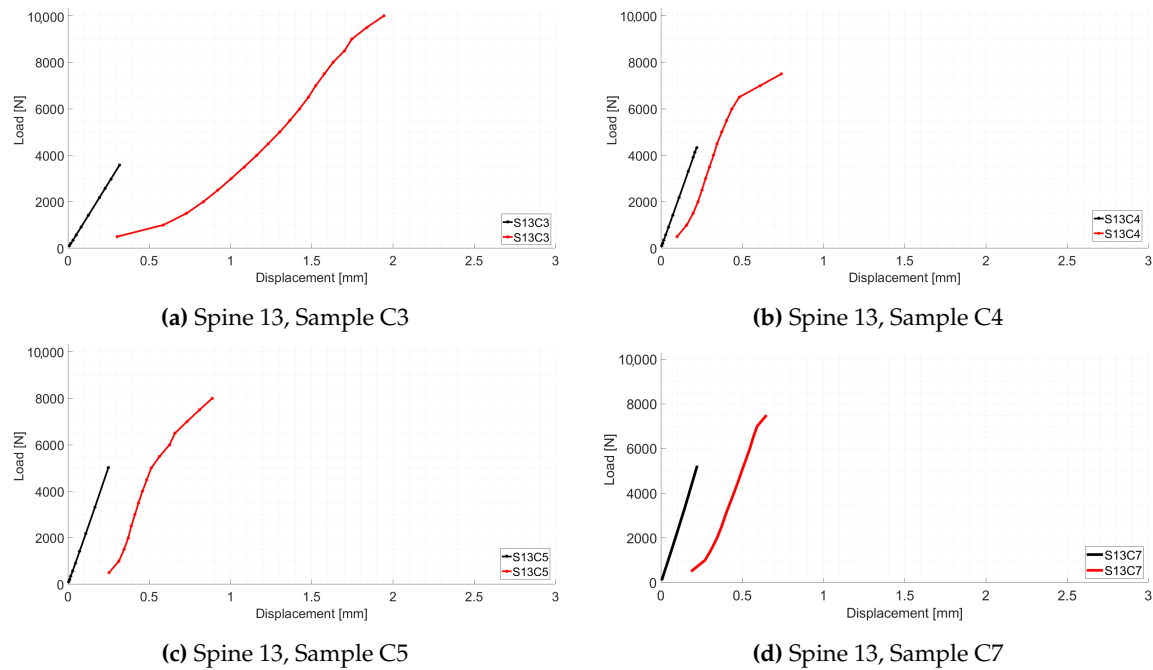

**Figure 4.** Load-Displacement curves from the validation models. Red curves are the DIC/experimental results. Black curves are the numerical results.

### 1.3. Dynamic Results - Load-Displacement curves

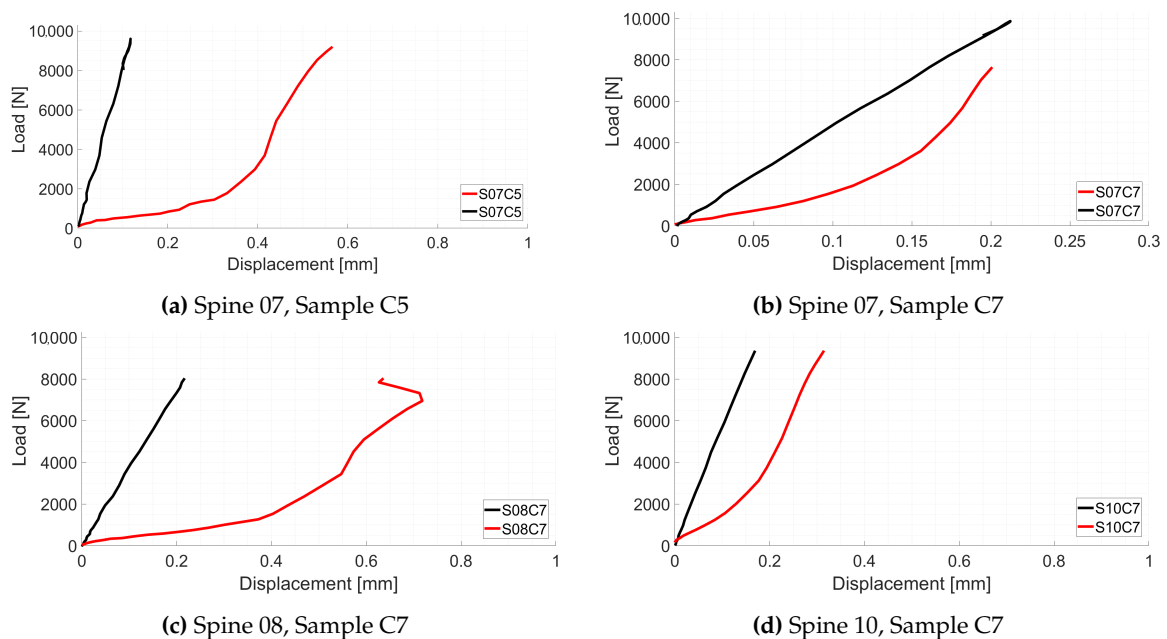

**Figure 5.** Load-Displacement curves from the dynamic models. Red curves are the DIC/experimental results. Black curves are the numerical results.
